# Supplementary material
Source: Springer Nature journal article supplement (https://www.springermedizin.de/resource/supplementary/12880_2013_214_MOESM2_ESM.pdf/9450316)
Supplement: MOESM2 [file 9450316]

Sample Segmentation and Image Cropping

Colour Normalisation

Colourspace Conversion

Contrast Enhancement

Linear Combination

Thresholding

Morphological Processing

Object Classification

User Interaction

*Process image to improve  
algorithm efficiency and  
robustness*

*Enhance contrast of  
epidermis*

*Create a binary mask of  
epidermis*

*Remove non-epidermis  
objects*
